# Supplementary material for: A Highly Controllable Electrochemical Anodization Process to Fabricate Porous Anodic Aluminum Oxide Membranes
Source: PubMed Central journal article supplement (PMC4691247; doi:10.1186/s11671-015-1202-y), 2015-12-26
Supplement: 11671_2015_1202_MOESM1_ESM.pdf [file 11671_2015_1202_MOESM1_ESM.pdf]

## **A Highly Controllable Electrochemical Anodization Process to Fabricate Porous Anodic Aluminum Oxide Membranes**

Yuanjing Lin<sup>1</sup>, Qingfeng Lin<sup>1</sup>, Xue Liu<sup>1</sup>, Yuan Gao<sup>1</sup>, Jin He<sup>2</sup>, Wenli Wang<sup>3,4\*</sup>, Zhiyong Fan<sup>1\*</sup>

<sup>1</sup>Department of Electronic and Computer Engineering, The Hong Kong University of Science and Technology, Clear Water Bay, Kowloon, Hong Kong, China SAR

<sup>2</sup>Shenzhen SOC Key Laboratory, Peking University-HKUST Shenzhen-Hong Kong Institution, Shenzhen, 518051, China

<sup>3</sup>College of Textile and Clothing Engineering, Soochow University, Suzhou, 215021, China

<sup>4</sup>National Engineering Laboratory for Modern Silk, Suzhou, 215123, China

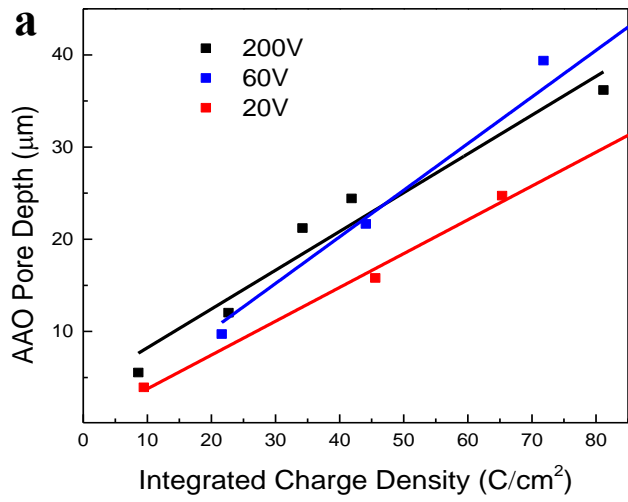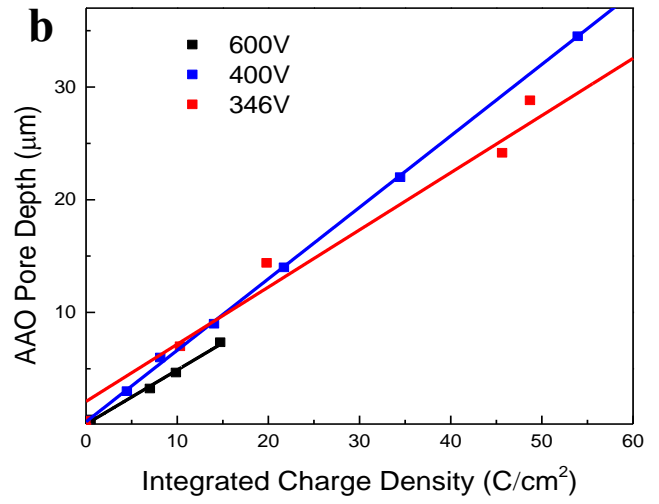

**Figure S1.** Linear correlation between AAO pore depth and integrated charge density in a large voltage range (a) 20-200 V; (b) 346V-600 V.
